# Supplementary material for: Lipid Dysregulation Induced by Gasoline and Diesel Exhaust Exposure and the Interaction with Age
Source: MDPI journal article supplement (doi:10.3390/toxics12040303), 2024-04-19
Supplement: s1 [file s1]

## Supplemental Materials

### Supplemental Figure

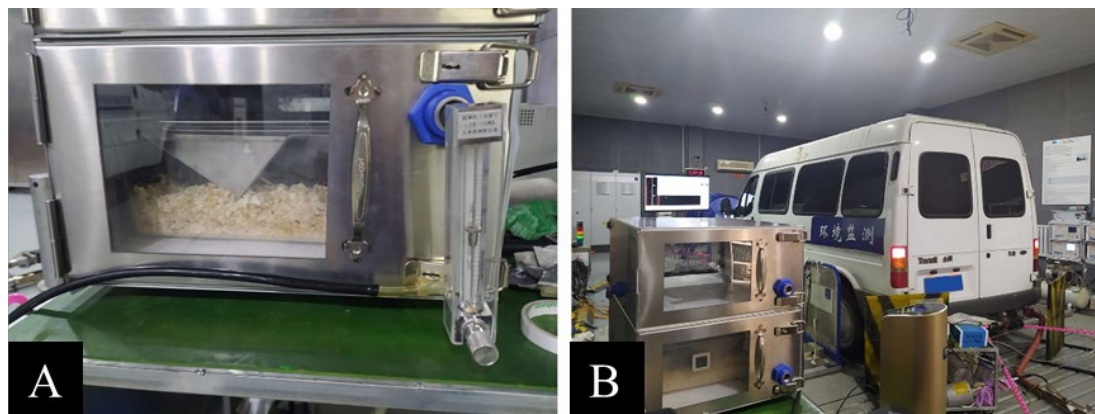

**Fig. S1** (A) The exposure chamber; (B) The exposure process

### Supplemental Table

**Table S1.** Typical quantity-size distribution of PM<sub>2.5</sub>

| Sampling location | Particle size of PM <sub>2.5</sub> (nm)  | 15   | 30   | 70   | 120  | 200   | 320   | 500   | 800   | 1700  | 2400  |
|-------------------|------------------------------------------|------|------|------|------|-------|-------|-------|-------|-------|-------|
| Wujinglu Tunnel   | Mass percentage of PM <sub>2.5</sub> (%) | 0.01 | 0.26 | 2.37 | 4.64 | 10.19 | 20.02 | 27.37 | 13.75 | 14.63 | 6.76  |
| Teda Street       | Mass percentage of PM <sub>2.5</sub> (%) | 0.02 | 0.12 | 0.42 | 1.62 | 5.85  | 13.88 | 18.79 | 23.84 | 20.22 | 15.24 |

### Supplemental Text

**Text S1** Calculation of the dose.

$$E = C \times B \times t$$

E: Inhalation exposure of pollutant,  $\mu\text{g}$ ;

C: The concentration of pollutant,  $\mu\text{g}/\text{m}^3$ ;

B: respiratory rate,  $\text{m}^3/\text{d}$ . For human beings, the value equals to  $10.8 \text{ m}^3/\text{d}$ ;

t: exposure time, d.
